# Supplementary material for: Alarm tones, music and their elements: Analysis of reported waking sounds to counteract sleep inertia
Source: PubMed Central journal article supplement (PMC6986749; doi:10.1371/journal.pone.0215788), 2020-01-28
Supplement: pone.0215788.s001.pdf [file pone.0215788.s001.pdf]

**Alarm tones, music and their elements: Analysis of reported waking sounds  
to counteract sleep inertia.**

**Supporting information**

**'Waking Sound and Sleep Inertia' Questionnaire**

Stuart J. McFarlane<sup>1</sup>, Jair E. Garcia<sup>1</sup>, Darrin S. Verhagen<sup>2</sup>, Adrian G. Dyer<sup>1\*</sup>

<sup>1</sup> School of Media and Communication, RMIT University, Melbourne, Vic, 3001, Australia.

<sup>2</sup> School of Design, RMIT University, Melbourne, Vic, 3001, Australia.

\*adrian.dyer@rmit.edu.au (AGD)

## Section 1: Welcome Page

---

Welcome to the 'Waking Sound and Sleep Inertia' test!

Please complete this questionnaire within four hours after waking up.

By completing the questionnaire, you are acknowledging that you have given consent to participate in this questionnaire.

Thank you for your time.

## Section 2: Demographic Information

---

**Item 1.** What is your age?

| 18 - 29 | 30 - 39 | 40 - 49 | 50 - 59 | 60+ |
|---------|---------|---------|---------|-----|
|         |         |         |         |     |

**Item 2.** What is your gender?

| Male | Female | Other |
|------|--------|-------|
|      |        |       |

**Item 3.** How much music would you listen to on average per day?

| 0 - 30 minutes | 31 minutes - 1 hour | 1 - 3 hours | 3 + hours |
|----------------|---------------------|-------------|-----------|
|                |                     |             |           |

**Item 4.** Do you like listening to music?

| Dislike a great deal | Dislike somewhat | Neither like nor dislike | Like somewhat | Like a great deal |
|----------------------|------------------|--------------------------|---------------|-------------------|
|                      |                  |                          |               |                   |

**Item 5.** How well do you think you can describe music?

| Not well at all | Slightly well | Moderately well | Very well | Extremely well |
|-----------------|---------------|-----------------|-----------|----------------|
|                 |               |                 |           |                |

### Section 3: Waking Sound

---

**Item 6.** Do you use audio to wake up?

| Yes - Forward to Item 7. | No - Forward to Item 6.1. |
|--------------------------|---------------------------|
|                          |                           |

**Item 6.1.** How do you wake up?

|                     |
|---------------------|
| Please describe:    |
|                     |
| Forward to Item 14. |

**Item 7.** What device do you use to play the audio?

| Clock Radio (alarm) | Mobile phone | Tablet | Laptop | Other - Please describe: |
|---------------------|--------------|--------|--------|--------------------------|
|                     |              |        |        |                          |

**Item 8.** How many days a week do you use audio to wake up?

| 1. | 2. | 3. | 4. | 5. | 6. | 7. |
|----|----|----|----|----|----|----|
|    |    |    |    |    |    |    |

**Item 9.** Do you use the same audio to wake up every day?

| Yes | No – Please describe: |
|-----|-----------------------|
|     |                       |

**Item 10.** Which most frequently used audio for waking up best represents yours?

| Alarm tone | Musical song<br>Forward to 10.1. | Instrumental music<br>Forward to 10.1. | Natural sounds | Radio<br>Please specify the<br>radio station: | Other<br>Please describe: |
|------------|----------------------------------|----------------------------------------|----------------|-----------------------------------------------|---------------------------|
|            |                                  |                                        |                |                                               |                           |

**Item 10.1.** Please specify the genre:

| Rock | Pop | Hip Hop/<br>Rap | Disco | Electronic | Country | Blues | Classical | Opera | R&B /<br>Soul | World<br>music |
|------|-----|-----------------|-------|------------|---------|-------|-----------|-------|---------------|----------------|
|      |     |                 |       |            |         |       |           |       |               |                |

**Item 11.** On a scale from 1 to 5; how would you classify the audio's...

|                                                                                    | 1. | 2. | 3. | 4. | 5. |
|------------------------------------------------------------------------------------|----|----|----|----|----|
| Melody (unmelodic = 1, neither unmelodic nor melodic = 3, very melodic = 5)        |    |    |    |    |    |
| Rhythm (non-rhythmic = 1, neither nonrhythmic nor rhythmic = 3, very rhythmic = 5) |    |    |    |    |    |
| Tempo (slow tempo = 1, neither slow tempo nor fast tempo = 3, fast tempo = 5)      |    |    |    |    |    |
| Pitch (low pitch = 1, neither low pitch nor high pitch = 3, high pitch = 5)        |    |    |    |    |    |
| Volume (low volume = 1, neither low volume nor high volume = 3, high volume= 5)    |    |    |    |    |    |

**Item 12.** Does of the volume increase in loudness over time?

| Yes | No |
|-----|----|
|     |    |

**Item 13.** How would you classify the feeling of the audio when waking up?

| Very unpleasant | Unpleasant | Neutral | Pleasant | Very pleasant |
|-----------------|------------|---------|----------|---------------|
|                 |            |         |          |               |

## Section 4: Sleep Inertia

---

**Item 14.** SIQ. After you wake up, to what extent do you...

|                                                      | 1 = Not at all | 2 = A little | 3 = Somewhat | 4 = Often | 5 = All the time |
|------------------------------------------------------|----------------|--------------|--------------|-----------|------------------|
| Have problems getting out of bed?                    |                |              |              |           |                  |
| Hit the snooze button on the alarm?                  |                |              |              |           |                  |
| Bump into and drop things?                           |                |              |              |           |                  |
| Notice that you move more slowly?                    |                |              |              |           |                  |
| Notice that you feel sleepy?                         |                |              |              |           |                  |
| Notice your eyes feeling heavy, sore, or itchy?      |                |              |              |           |                  |
| Notice your arms and/or legs feeling tired or heavy? |                |              |              |           |                  |
| Notice that your mind feels groggy, fuzzy or hazy?   |                |              |              |           |                  |
| Notice that it is difficult to keep your balance?    |                |              |              |           |                  |
| Have difficulty concentrating?                       |                |              |              |           |                  |
| Find that you think more slowly?                     |                |              |              |           |                  |
| Find that you make more mistakes/errors?             |                |              |              |           |                  |
| Have difficulty getting your thoughts together?      |                |              |              |           |                  |
